# Supplementary figures and images for: Electrical Conductivity and pH Are Two of the Main Factors Influencing the Composition of Arbuscular Mycorrhizal Fungal Communities in the Vegetation Succession Series of Songnen Saline-Alkali Grassland
Source: MDPI journal article supplement (doi:10.3390/jof9090870), 2023-08-23

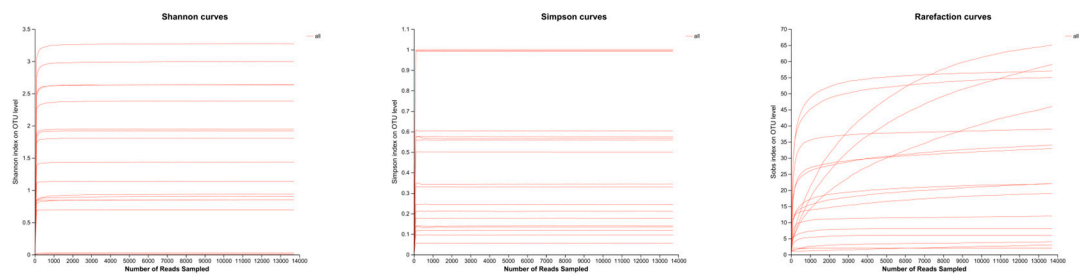

**Figure S2: Dilution curve of species diversity.**

Supplement: s1 [file s1]

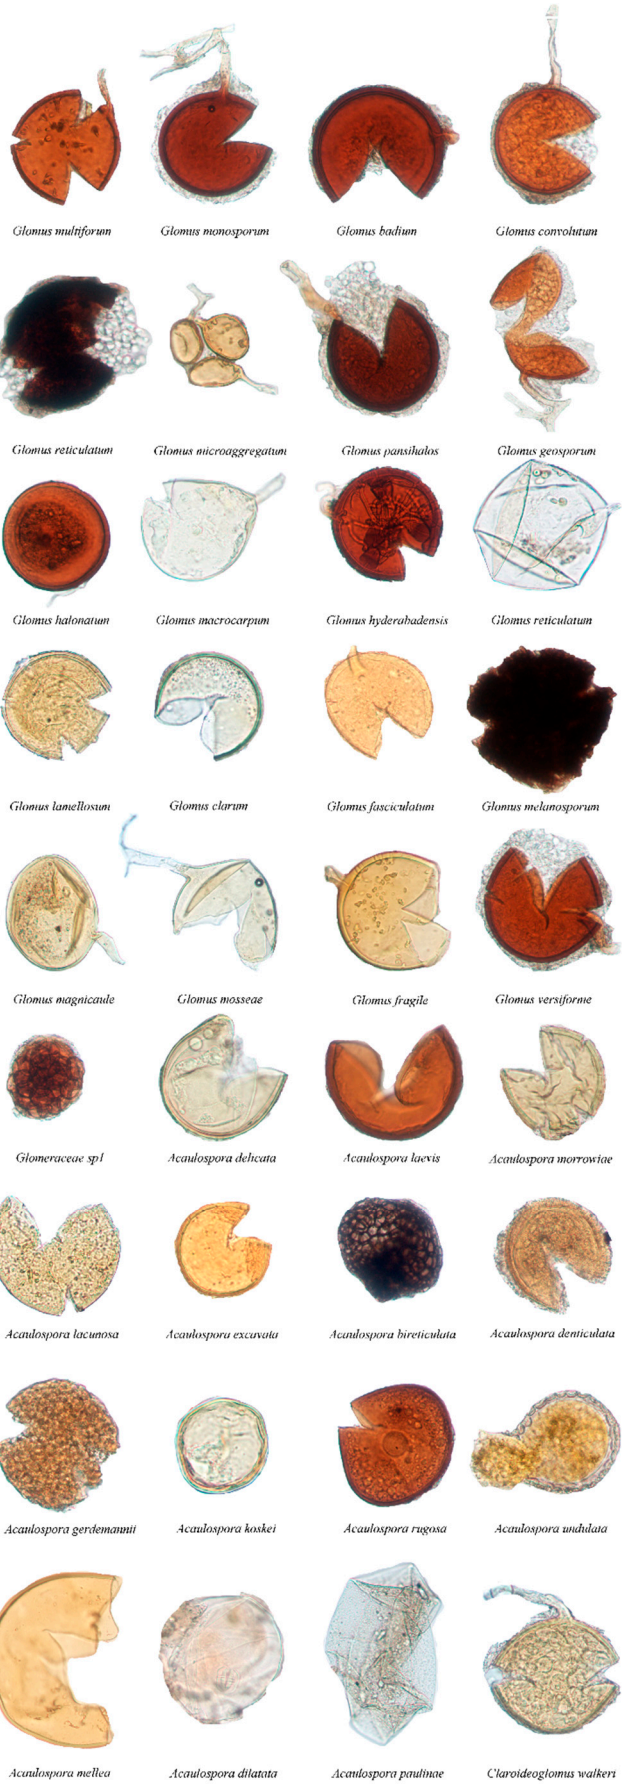

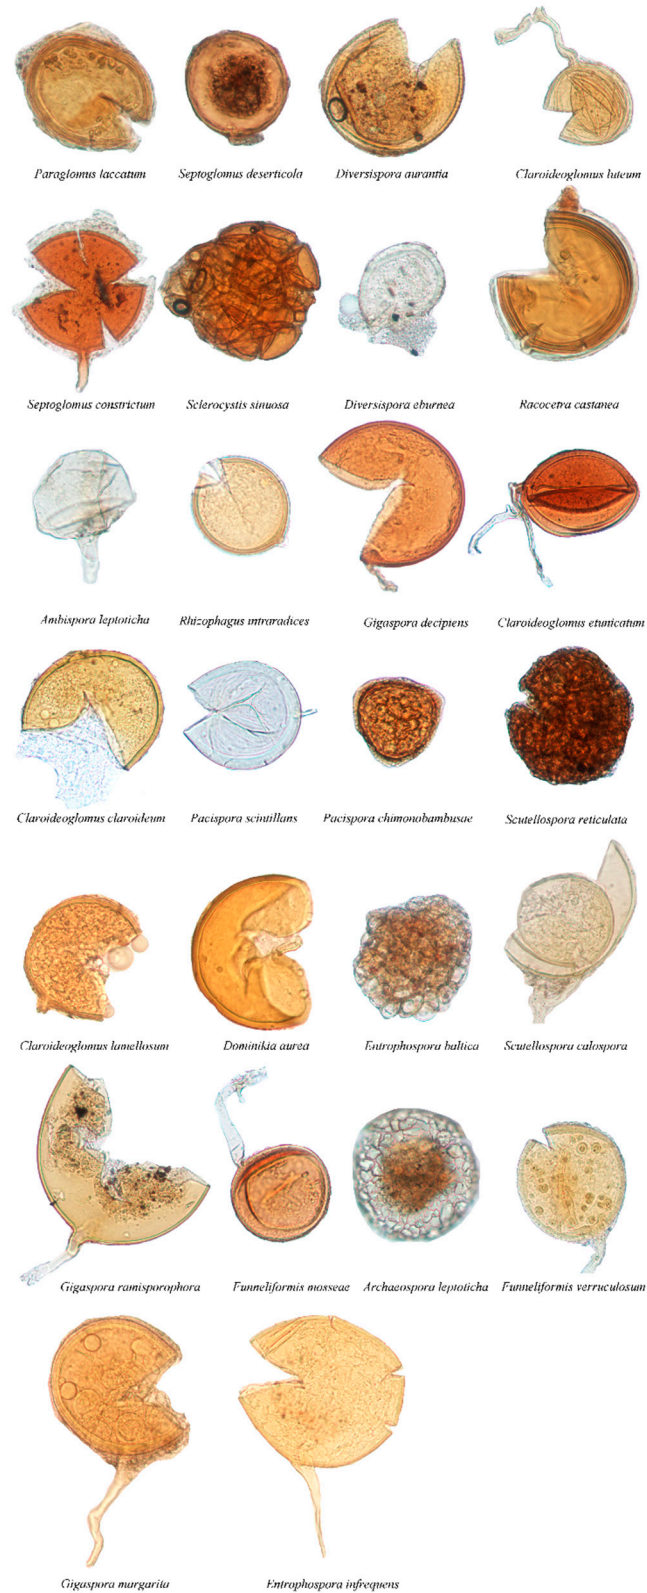

**Figure S1: Morphological identification of spores in soil**

Supplement: s1 [file s1]
